# Supplementary material for: Consumption of Dairy Foods and Cardiovascular Disease: A Systematic Review
Source: MDPI journal article supplement (doi:10.3390/nu14040831), 2022-02-16
Supplement: s1 [file s1]

## **Supplementary Material**

### **CONTENTS**

**Supplemental Methods S1.** Search strategy

**Supplemental Figure S1.** PRISMA flow diagram

**Supplemental Table S1.** Summary of meta-analyses of randomized controlled trials on the effect of dairy products intake on body weight and waist circumference.

**Supplemental Table S2.** Summary of meta-analyses of randomized controlled trials on the effect of dairy products intake on fasting glucose, glycated hemoglobin and insulin resistance.

**Supplemental Table S3.** Summary of meta-analyses of randomized controlled trials on the effect of dairy products intake on blood pressure.

**Supplemental Table S4.** Summary of meta-analyses of randomized controlled trials on the effect of dairy products intake on plasma lipids.

**Supplemental Table S5.** Summary of meta-analyses of randomized controlled trials on the effect of dairy products intake on markers of subclinical inflammation.

## **Supplemental Methods S1. Search strategy**

*Search terms for meta-analysis of prospective cohort studies:*

(dairy OR dairy products OR total dairy OR full fat dairy OR low fat dairy OR milk OR fermented dairy OR cheese OR yogurt) AND (all-cause mortality OR coronary heart disease incidence OR coronary heart disease mortality OR cardiovascular disease incidence OR cardiovascular disease mortality OR coronary artery disease OR acute myocardial infarction)

*Search terms for meta-analysis of RCT:*

(dairy OR dairy products OR total dairy OR full fat dairy OR low fat dairy OR milk OR fermented dairy OR cheese OR yogurt) AND (body weight OR weight gain OR weight reduction OR waist circumference OR blood pressure OR systolic blood pressure OR diastolic blood pressure OR glycemia OR fasting glucose OR plasma glucose OR blood glucose OR glycated hemoglobin OR HbA1c OR HOMA index OR insulin resistance OR insulin sensitivity OR blood lipids OR cholesterol OR total cholesterol OR LDL cholesterol OR HDL cholesterol OR triglycerides OR inflammation OR C reactive protein OR CRP OR interleukin 6 OR IL 6 OR tumor necrosis factor alpha OR TNF alpha OR adiponectin)

*Filters applied:*

Meta-analysis; Humans; English.

Supplemental Figure S1. PRISMA flow diagram

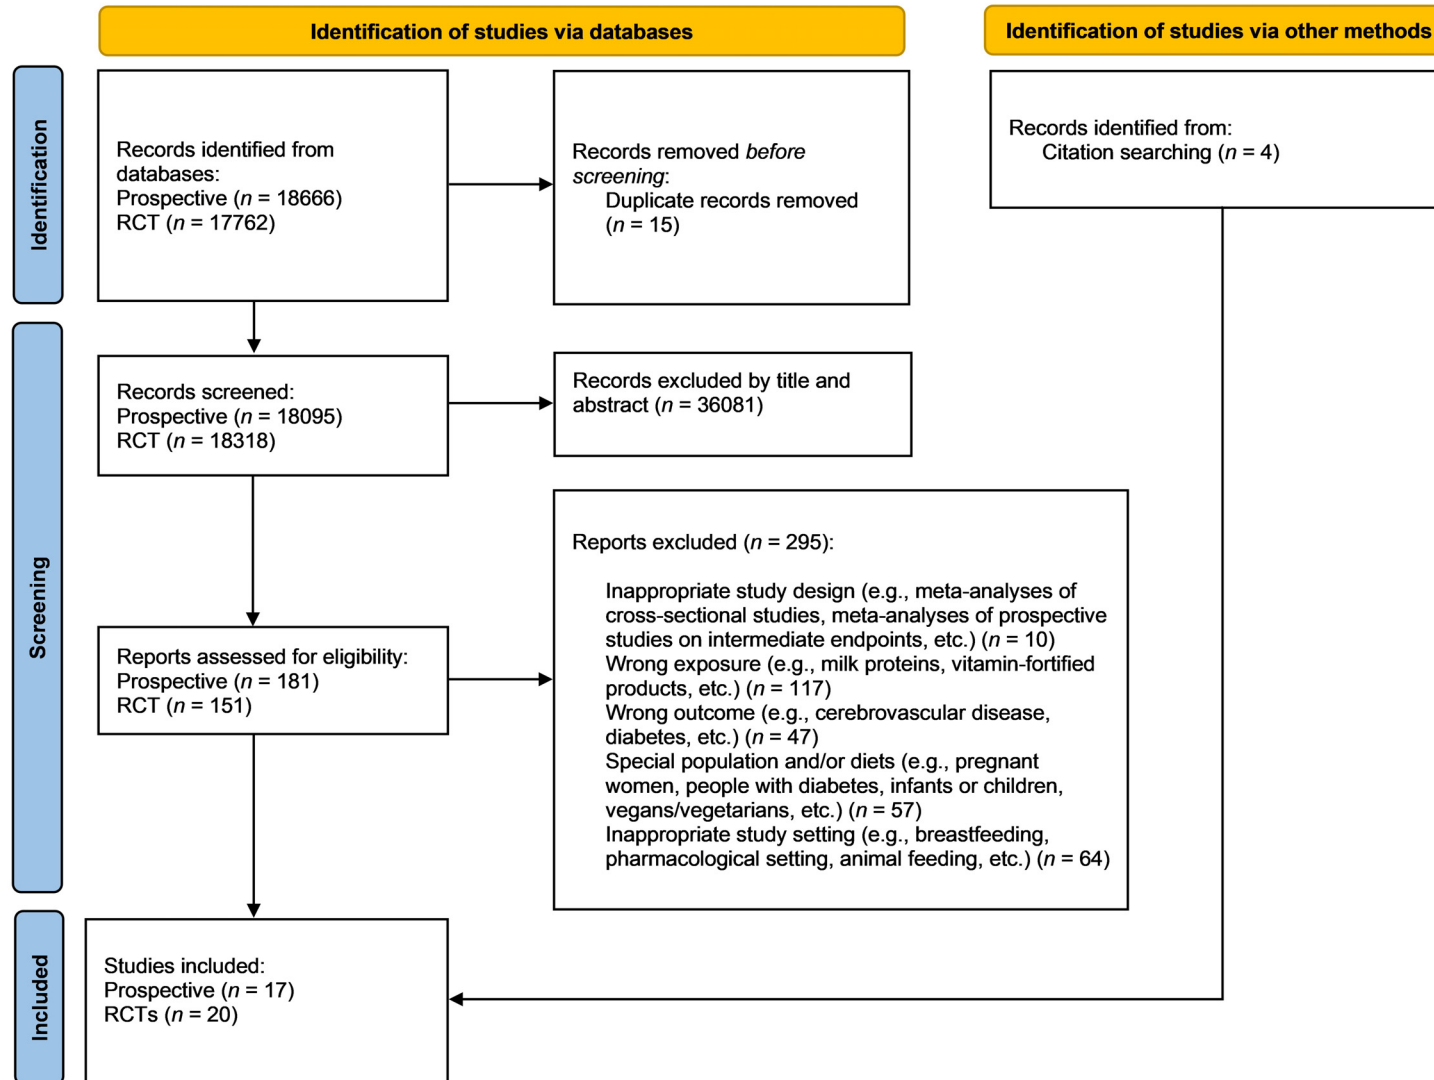

**Supplemental Table S1.** Summary of meta-analyses of randomized controlled trials on the effect of dairy products intake on body weight and waist circumference.

| DAIRY PRODUCT | Author, year    | No. of studies | No. and type of subjects                                         | Body weight                                                                                   |                                                                           | Weighted Mean Difference (95% CI) |
|---------------|-----------------|----------------|------------------------------------------------------------------|-----------------------------------------------------------------------------------------------|---------------------------------------------------------------------------|-----------------------------------|
|               |                 |                |                                                                  | Intervention (duration and dose)                                                              | Comparison                                                                |                                   |
| TOTAL DAIRY   | Abar-gouei 2012 | 5              | 453<br>Not defined                                               | 21-48 wk<br>Increased dairy (3-4 s/d) without energy restriction                              | Intervention vs. usual diet                                               | 0.33 (−0.35; 1.00) kg             |
|               | Abar-gouei 2012 | 9              | 430<br>Not defined                                               | 8-48 wk<br>Increased dairy (3-5 s/d) with energy restriction                                  | Intervention vs. usual diet                                               | −1.29 (−1.98; −0.60) kg           |
|               | Chen 2012       | 13             | 1668 with normal weight, overweight, obesity                     | 1-36 mo<br>1-6.5 s/d of dairy without energy restriction                                      | Intervention vs. usual diet (without energy restriction)                  | 0.39 (−0.36; 1.13) kg             |
|               | Chen 2012       | 16             | 850 with normal weight, overweight, obesity                      | 2-12 mo<br>1-6.5 s/d of dairy with energy restriction                                         | Intervention vs. usual diet (with energy restriction)                     | −0.79 (−1.35; −0.23) kg           |
|               | Benatar 2013    | 18             | 1629 with normal weight, overweight, obesity, MS (BMI: 25.6±6.2) | 10-39 wk (median 26 wk)<br>Increased dairy food without additional interventions              | Intervention vs. usual diet                                               | 0.60 (0.30; 0.90) kg              |
|               | Booth 2015      | 31             | 2091 with normal weight, overweight, obesity                     | 3-24 mo (median 7 mo)<br>Calcium intake by 482–2400 mg/d via dairy products (low fat, no fat) | Intervention vs. usual diet or moderate dairy or low-dairy or low-Ca diet | −0.06 (−0.54; 0.43) kg            |

|                        |    |                                                        |                                                                                                                                                                            |                                                                                                                  |                         |
|------------------------|----|--------------------------------------------------------|----------------------------------------------------------------------------------------------------------------------------------------------------------------------------|------------------------------------------------------------------------------------------------------------------|-------------------------|
|                        |    |                                                        | dairy or fat content not specified) with and without energy restriction                                                                                                    | (with and without energy restriction)                                                                            |                         |
|                        |    |                                                        | 3-12 mo                                                                                                                                                                    |                                                                                                                  |                         |
|                        |    |                                                        | Calcium intake by                                                                                                                                                          | Intervention vs.                                                                                                 |                         |
| <b>Booth 2015</b>      | 19 | 1246 with normal weight, overweight, obesity           | 482–2400 mg/d via dairy products (low fat, no fat dairy or fat content not specified) with energy restriction                                                              | usual diet or moderate dairy or low-dairy or low-Ca diet (with energy restriction)                               | –0.32 (–0.93; 0.30) kg  |
|                        |    |                                                        | 8-48 wk. Dairy foods (milk, mixed dairy or yogurt) and dairy supplements (average 51 g/d of whey fraction high in leucine or whey protein isolate) with energy restriction | Intervention vs. usual diet (differences in the amount of dairy in the intervention vs. control group: 2- 4 s/d) |                         |
| <b>Stonehouse 2016</b> | 17 | 864 with overweight/obesity (1 study MS; 1 study PCOS) |                                                                                                                                                                            |                                                                                                                  | –0.92 (–1.63; –0.20) kg |
|                        |    |                                                        | 1-36 mo                                                                                                                                                                    | Intervention vs.                                                                                                 |                         |
| <b>Geng 2018</b>       | 19 | 2116 Not defined                                       | 0.5-5.24 g/d of dairy supplement without energy restriction                                                                                                                | usual diet or dairy-free diet or moderate serving dairy                                                          | 0.36 (0.01; 0.70) kg    |
|                        |    |                                                        | 1-12 mo                                                                                                                                                                    | Intervention vs.                                                                                                 |                         |
| <b>Geng 2018</b>       | 16 | 930 Not defined                                        | 0.5-5.24 g/d of dairy supplement with energy restriction                                                                                                                   | usual diet or dairy-free diet or moderate serving dairy                                                          | –0.64 (–1.05; –0.24) kg |
|                        |    |                                                        | 3-52 wk                                                                                                                                                                    | Intervention vs.                                                                                                 |                         |
| <b>Sochoł 2019</b>     | 23 | 2362 with overweight, obesity                          | Dairy supplementation (especially low-fat dairies)                                                                                                                         | control (i.e. usual diet; low (<2 s/d)                                                                           | –0.42 (–0.72; –0.12) kg |

|                     |                        |                        |                                                            |                                                                                                         |                                                                                                                            |                                            |
|---------------------|------------------------|------------------------|------------------------------------------------------------|---------------------------------------------------------------------------------------------------------|----------------------------------------------------------------------------------------------------------------------------|--------------------------------------------|
|                     |                        |                        |                                                            | with or without<br>an energy deficit<br>or caloric re-<br>striction<br>(dose NA)                        | or no dairy in-<br>take; placebo<br>capsules; energy<br>deficit diet; soy<br>intake of a com-<br>parable energy<br>intake) |                                            |
| LOW-FAT DAIRY       | Benatar<br>2013        | 8                      | 941 with nor-<br>mal weight,<br>overweight,<br>obesity     | ≥ 1 mo<br>Increased low fat<br>dairy without ad-<br>ditional interven-<br>tions (dose NA)               | Intervention vs.<br>usual diet                                                                                             | 0.82 (0.35; 1.28) kg                       |
| FULL-FAT DAIRY      | Benatar<br>2013        | 10                     | 688 with nor-<br>mal weight,<br>overweight,<br>obesity, MS | ≥ 1 mo<br>Increased whole<br>fat dairy without<br>additional inter-<br>ventions (dose<br>NA)            | Intervention vs.<br>usual diet                                                                                             | 0.41 (0.04; 0.79) kg                       |
| Waist circumference |                        |                        |                                                            |                                                                                                         |                                                                                                                            |                                            |
| DAIRY PRODUCT       | Author,<br>year        | No. of<br>stud-<br>ies | No. and type<br>of subjects                                | Intervention<br>(duration and<br>dose)                                                                  | Comparison                                                                                                                 | Weighted Mean Dif-<br>ference<br>(95 % CI) |
| TOTAL DAIRY         | Abar-<br>gouei<br>2012 | 2                      | 147<br>Not defined                                         | 24 wk<br>Increased dairy<br>(3-5 s/d) without<br>energy restriction                                     | Intervention vs.<br>usual diet                                                                                             | -2.68 (-8.02; 2.66) cm                     |
|                     | Abar-<br>gouei<br>2012 | 7                      | 289<br>Not defined                                         | 8-48 wk<br>Increased dairy<br>(3-5 s/d) with en-<br>ergy restriction                                    | Intervention vs.<br>usual diet                                                                                             | -2.43 (-3.42; -1.44)<br>cm                 |
|                     | Benatar<br>2013        | 6                      | 440 with nor-<br>mal weight,<br>overweight,<br>obesity, MS | 4-16 wk (median<br>10 wk)<br>Increased dairy<br>without addi-<br>tional interven-<br>tions<br>(dose NA) | Intervention vs.<br>usual diet                                                                                             | -0.07 (-1.24; 1.10) cm                     |

|                                                         |                           |    |                                                            |                                                                                                                                                           |                                                                                                                                                                                           |                            |
|---------------------------------------------------------|---------------------------|----|------------------------------------------------------------|-----------------------------------------------------------------------------------------------------------------------------------------------------------|-------------------------------------------------------------------------------------------------------------------------------------------------------------------------------------------|----------------------------|
|                                                         | <b>Geng 2018</b>          | 5  | 555<br>Not defined                                         | 1-12 mo<br>0.5 - 5.24 g/d of<br>dairy supplement<br>without energy<br>restriction                                                                         | Intervention vs.<br>usual diet or<br>dairy-free diet or<br>moderate serving<br>dairy                                                                                                      | -0.24 (-1.36; 0.89) cm     |
|                                                         | <b>Geng 2018</b>          | 10 | 505<br>Not defined                                         | 2-12 mo<br>2.37-5.24 g/d of<br>dairy supplement<br>with and without<br>energy restriction                                                                 | Intervention vs.<br>usual diet or<br>dairy-free diet or<br>moderate serving<br>dairy                                                                                                      | -2.18 (-4.30; -0.06)<br>cm |
|                                                         | <b>Sochol 2019</b>        | 13 | 1348 with<br>overweight,<br>obesity                        | 4-48 wk<br>Dairy supplementa-<br>tion (especially<br>low-fat dairies)<br>with or without<br>an energy deficit<br>or caloric re-<br>striction<br>(dose NA) | Intervention vs.<br>control (i.e. usual<br>diet; low (<2s/d)<br>or no dairy in-<br>take; placebo<br>capsules; energy<br>deficit diet; soy<br>intake of a com-<br>parable energy<br>intake | -1.09 (-1.68; -0.58)<br>cm |
| <b>LOW-FAT DAIRY</b>                                    | <b>Benatar 2013</b>       | 2  | 134 with nor-<br>mal weight,<br>overweight,<br>obesity     | ≥ 1 mo<br>Increased low fat<br>dairy without ad-<br>ditional interven-<br>tions (dose NA)                                                                 | Intervention vs.<br>usual diet                                                                                                                                                            | 1.18 (-0.61; 2.96) cm      |
| <b>FULL-FAT DAIRY</b>                                   | <b>Benatar 2013</b>       | 4  | 306 with nor-<br>mal weight,<br>overweight,<br>obesity, MS | ≥ 1 mo<br>Increased whole<br>fat dairy without<br>additional inter-<br>ventions (dose<br>NA)                                                              | Intervention vs.<br>usual diet                                                                                                                                                            | -0.58 (-1.99; 0.83) cm     |
| <b>FERMENTED<br/>DAIRY OR DAIRY<br/>PLUS PROBIOTICS</b> | <b>Comp-<br/>nys 2020</b> | 6  | 511 with<br>overweight,<br>obesity                         | Dairy matrix<br>added with probi-<br>otics (duration<br>and dose NA)                                                                                      | Intervention vs.<br>placebo or fer-<br>mented milk                                                                                                                                        | -0.49 (-0.68; -0.29)<br>cm |

CI: confidence interval; MS: metabolic syndrome; PCOS: polycystic ovarian syndrome; BMI: body mass index; wk: week(s); mo: month(s); s/d: serving per day; NA: not available.

**Table S2.** Summary of meta-analyses of randomized controlled trials on the effect of dairy products intake on fasting glucose, glycated hemoglobin and insulin resistance.

| DAIRY PRODUCT  | Author, year   | No. of studies | No. and type of subjects                                                   | Fasting glucose                                                                      |                                           | Weighted Mean Difference (95% CI) |
|----------------|----------------|----------------|----------------------------------------------------------------------------|--------------------------------------------------------------------------------------|-------------------------------------------|-----------------------------------|
|                |                |                |                                                                            | Intervention (duration and dose)                                                     | Comparison                                |                                   |
| TOTAL DAIRY    | Benatar 2013   | 8              | 750 with normal weight, overweight, obesity, MS                            | 8-12 wk (median 10 wk)<br>Increased dairy without additional interventions (dose NA) | Intervention vs. usual diet               | 1.32 (0.19; 2.45) mg/dl           |
|                | O' Connor 2019 | 34             | 2678 with normal weight, overweight, obesity, MS, sarcopenia, hypertension | 2-48 wk<br>Elevated dairy intake (3.1 s/d)                                           | Intervention vs. minimal intake (0.5 s/d) | 0.07 (0.01; 0.12) mmol/L          |
| LOW-FAT DAIRY  | Benatar 2013   | 4              | 398 with normal weight, overweight, obesity                                | ≥ 1 mo<br>Increased low fat dairy without additional interventions (dose NA)         | Intervention vs. usual diet               | 0.83 (−0.78; 2.43) mg/dL          |
|                | O'Connor 2019  | 14             | 862 Not defined                                                            | Elevated low fat dairy intake (< 2% fat content) (duration and dose NA)              | Intervention vs. minimal intake           | 0.07 (0.00; 0.14) mmol/L          |
| FULL-FAT DAIRY | Benatar 2013   | 4              | 352 with normal weight, overweight, obesity, MS                            | ≥ 1 mo<br>Increased whole fat dairy without additional interventions (dose NA)       | Intervention vs. usual diet               | 1.80 (0.21; 3.40) mg/dL           |
| CHEESE         | O'Connor 2019  | 3              | 231 Not defined                                                            | Elevated cheese intake (duration and dose NA)                                        | Intervention vs. minimal intake           | −0.04 (−0.23; 0.14) mmol/L        |



| MILK<br>AND/OR YO-<br>GURT                                  | O'Connor<br>2019  | 16                | 1136<br>Not defined                                                                                                                | Elevated milk/yogurt<br>intake<br>(duration and dose<br>NA)         | Intervention vs. min-<br>imal intake                   | -0.08 (0.02; 0.14) mmol/L                 |
|-------------------------------------------------------------|-------------------|-------------------|------------------------------------------------------------------------------------------------------------------------------------|---------------------------------------------------------------------|--------------------------------------------------------|-------------------------------------------|
|                                                             | O'Connor<br>2019  | 8                 | 535<br>Not defined                                                                                                                 | Elevated fermented<br>dairy products intake<br>(yogurt, cheese)     | Intervention vs. min-<br>imal intake                   | 0.02 (-0.09; 0.12)<br>mmol/L              |
|                                                             | Companys<br>2020  | 6                 | 378 with type 2 diabe-<br>tes                                                                                                      | Dairy matrix added<br>with probiotics (dura-<br>tion and dose NA)   | Intervention vs. pla-<br>cebo or fermented<br>milk     | -0.37 (-0.58; -0.17)<br>mmol/L            |
|                                                             | Dixon 2020        | 5                 | 304 with overweight,<br>obesity, pre-type 2 dia-<br>betes, type 2 diabetes,<br>MS, hypertension,<br>CHD, hypercholester-<br>olemia | Yogurt added with<br>probiotics (duration<br>and dose NA)           | Intervention vs. no<br>treatment or placebo<br>product | -12.88 (-24.54; -1.22)<br>mg/dl           |
|                                                             | Dixon 2020        | 4                 | 233 with overweight,<br>obesity, pre-type 2 dia-<br>betes, type 2 diabetes,<br>MS, hypertension,<br>CHD, hypercholester-<br>olemia | Milk added with pro-<br>biotics (duration and<br>dose NA)           | Intervention vs. no<br>treatment or placebo<br>product | -7.54 (-23.84; 8.76)<br>mg/dL             |
| FERMENTED-<br>DAIRIES OR<br>DAIRIES<br>PLUS PROBI-<br>OTICS |                   |                   |                                                                                                                                    |                                                                     |                                                        |                                           |
| Glycated hemoglobin                                         |                   |                   |                                                                                                                                    |                                                                     |                                                        |                                           |
| DAIRY<br>PRODUCT                                            | Author, year      | No. of<br>studies | No. and type of sub-<br>jects                                                                                                      | Intervention<br>(duration and dose)                                 | Comparison                                             | Weighted Mean Differ-<br>ence<br>(95% CI) |
| TOTAL<br>DAIRY                                              | O' Connor<br>2019 | 4                 | 512 with normal<br>weight, overweight,<br>obesity, MS                                                                              | 4-24 wk<br>Elevated dairy intake<br>(2.7 s/d)                       | Intervention vs. min-<br>imal intake (0.8 s/d)         | -0.09 (-0.16; -0.03) %                    |
|                                                             | O' Connor<br>2019 | 2                 | 274 with MS                                                                                                                        | ≥ 24 wk<br>Elevated dairy intake<br>(dose NA)                       | Intervention vs. min-<br>imal intake                   | -0.10 (-0.18; -0.02) %                    |
| LOW-FAT<br>DAIRY                                            | O'Connor<br>2019  | 2                 | 238<br>Not defined                                                                                                                 | < 24 wk<br>Elevated low fat dairy<br>intake (< 2% fat con-<br>tent) | Intervention vs. min-<br>imal intake                   | -0.08 (-0.20; 0.03) %                     |

| (dose NA)                                    |               |                |                                                                                                                 |                                                                                                                                  |                                                                                                                                                             |                                   |
|----------------------------------------------|---------------|----------------|-----------------------------------------------------------------------------------------------------------------|----------------------------------------------------------------------------------------------------------------------------------|-------------------------------------------------------------------------------------------------------------------------------------------------------------|-----------------------------------|
| MILK AND/OR YOGURT                           | O'Connor 2019 | 3              | 438<br>Not defined                                                                                              | Elevated milk/yogurt intake (duration and dose NA)                                                                               | Intervention vs. minimal intake                                                                                                                             | -0.09 (-0.16; -0.03) %            |
| FERMENTED DAIRIES OR DAIRIES PLUS PROBIOTICS | Dixon 2020    | 5              | 325 with overweight, obesity, pre-type 2 diabetes, type 2 diabetes, MS, hypertension, CHD, hypercholesterolemia | Yogurt added with probiotics (duration and dose NA)                                                                              | Intervention vs. no treatment or placebo product                                                                                                            | -0.55 (-1.03; -0.06) %            |
|                                              | Dixon 2020    | 2              | 158 with overweight, obesity, pre-type 2 diabetes, type 2 diabetes, MS, hypertension, CHD, hypercholesterolemia | Milk added with probiotics (duration and dose NA)                                                                                | Intervention vs. no treatment or placebo product                                                                                                            | -0.61 (-0.81; 0.58) %             |
| Insulin resistance (HOMA-IR)                 |               |                |                                                                                                                 |                                                                                                                                  |                                                                                                                                                             |                                   |
| DAIRY PRODUCT                                | Author, year  | No. of studies | No. and type of subjects                                                                                        | Intervention (duration and dose)                                                                                                 | Comparison                                                                                                                                                  | Weighted Mean Difference (95% CI) |
| TOTAL DAIRY                                  | Benatar 2013  | 4              | 270 with normal weight, overweight, obesity, MS                                                                 | 4-16 wk (median 10 wk)<br>Increased dairy without additional interventions (dose NA)                                             | Intervention vs. usual diet                                                                                                                                 | -0.63 (-1.50; 0.24)               |
|                                              | O'Connor 2019 | 13             | 840 with normal weight, overweight, obesity, MS, sarcopenia                                                     | 4-24 wk<br>Elevated dairy intake (2.7 s/d)                                                                                       | Intervention vs. minimal intake (0.3 s/d)                                                                                                                   | -0.07 (-0.26; 0.12)               |
|                                              | Sochol 2019   | 12             | 794 with overweight, obesity                                                                                    | 4-48 wk<br>Dairy supplementation (especially low-fat dairies) with or without an energy deficit or caloric restriction (dose NA) | Intervention vs. control (i.e. usual diet; low (<2s/d) or no dairy intake; placebo capsules; energy deficit diet; soy intake of a comparable energy intake) | -1.21 (-1.74; -0.67)              |

|                                                     |                      |   |                    |                                                                                        |                                 |                     |
|-----------------------------------------------------|----------------------|---|--------------------|----------------------------------------------------------------------------------------|---------------------------------|---------------------|
| <b>LOW-FAT DAIRY</b>                                | <b>O'Connor 2019</b> | 4 | 212<br>Not defined | ≥ 12 wk<br>Elevated low fat dairy intake<br>(< 2% fat content)<br>dose NA)             | Intervention vs. minimal intake | 0.01 (−0.26; 0.28)  |
| <b>CHEESE</b>                                       | <b>O'Connor 2019</b> | 2 | 131<br>Not defined | Elevated cheese intake<br>(duration and dose NA)                                       | Intervention vs. minimal intake | 0.24 (−0.19; 0.66)  |
| <b>MILK AND/OR YOGURT</b>                           | <b>O'Connor 2019</b> | 6 | 269<br>Not defined | Elevated milk/yogurt intake<br>(duration and dose NA)                                  | Intervention vs. minimal intake | −0.01 (−0.26; 0.23) |
| <b>FERMENTED DAIRIES OR DAIRIES PLUS PROBIOTICS</b> | <b>O'Connor 2019</b> | 4 | 188<br>Not defined | Elevated fermented dairy products intake<br>(yogurt, cheese)<br>(duration and dose NA) | Intervention vs. minimal intake | 0.10 (−0.23; 0.43)  |

CI: confidence interval; CHD: coronary heart disease; MS: metabolic syndrome; HOMA-IR: homeostasis model assessment-insulin resistance; wk: week(s); mo: month(s); s/d: serving per day; NA: not available.

**Table S3.** Summary of meta-analyses of randomized controlled trials on the effect of dairy products intake on blood pressure.

| Systolic blood pressure                  |              |                |                                                                                                                                     |                                                                                           |                                                        |                                    |
|------------------------------------------|--------------|----------------|-------------------------------------------------------------------------------------------------------------------------------------|-------------------------------------------------------------------------------------------|--------------------------------------------------------|------------------------------------|
| DAIRY PRODUCT                            | Author, year | No. of studies | No. and type of sub-jects                                                                                                           | Intervention (duration and dose)                                                          | Comparison                                             | Weighted Mean Differ-ence (95% CI) |
| TOTAL DAIRY                              | Benatar 2013 | 7              | 711 with normal weight, overweight, obesity, MS                                                                                     | 7-26 wk<br>Increased dairy with-<br>out additional inter-<br>ventions<br>(dose NA)        | Intervention vs. usual<br>diet                         | −0.41 (−1.63; 0.81) mmHg           |
| LOW-FAT DAIRY                            | Benatar 2013 | 3              | 342 with normal weight, overweight, obesity, MS                                                                                     | ≥ 1 mo<br>Increased low fat dairy<br>without additional in-<br>terventions (dose NA)      | Intervention vs. usual<br>diet                         | −0.85 (−2.55; 0.84) mmHg           |
| FULL-FAT DAIRY                           | Benatar 2013 | 4              | 369 with normal weight, overweight, obesity, MS                                                                                     | ≥ 1 mo<br>Increased whole fat<br>dairy without addi-<br>tional interventions<br>(dose NA) | Intervention vs. usual<br>diet                         | 0.07 (−1.69; 1.83) mmHg            |
| FERMENTED DAIRY OR DAIRY PLUS PROBIOTICS | Usinger 2012 | 15             | 1232 with normal or high normal blood pressure or hyperten-<br>sion                                                                 | 4-21 wk<br>Fermented milk                                                                 | Intervention vs. pla-<br>cebo                          | −2.45 (−4.30; −0.60) mmHg          |
|                                          | Dong 2013    | 6              | No. NA<br>mostly with no anti-<br>hypertensive drug<br>use                                                                          | 8 wk (median)<br>100-450 g/d of probi-<br>otic fermented milk                             | Intervention vs. pla-<br>cebo product                  | −2.09 (−4.34; 0.17) mmHg           |
|                                          | Dixon 2020   | 3              | 217 with overweight, obesity, pre-type 2 di-<br>abetes, type 2 diabe-<br>tes, MS, hyperten-<br>sion, CHD, hypercho-<br>lesterolemia | Yogurt added with<br>probiotics (duration<br>and dose NA)                                 | Intervention vs. no<br>treatment or placebo<br>product | −3.56 (−7.43; 0.31) mmHg           |
|                                          | Dixon 2020   | 4              | 214 with overweight, obesity, pre-type 2 di-<br>abetes, type 2 diabe-                                                               | Milk added with pro-<br>biotics (duration and<br>dose NA)                                 | Intervention vs. no<br>treatment or placebo<br>product | −2.68 (−5.81; 0.44) mmHg           |

| tes, MS, hypertension, CHD, hypercholesterolemia |              |                |                                                                                                                 |                                                                                |                                          |                                   |
|--------------------------------------------------|--------------|----------------|-----------------------------------------------------------------------------------------------------------------|--------------------------------------------------------------------------------|------------------------------------------|-----------------------------------|
| Diastolic blood pressure                         |              |                |                                                                                                                 |                                                                                |                                          |                                   |
| DAIRY PRODUCT                                    | Author, year | No. of studies | No. and type of subjects                                                                                        | Intervention (duration and dose)                                               | Comparison                               | Weighted Mean Difference (95% CI) |
| TOTAL DAIRY                                      | Benatar 2013 | 7              | 711 with normal weight, overweight, obesity, MS                                                                 | 7-26 wk<br>Increased dairy without additional interventions (dose NA)          | Intervention vs. usual diet              | -0.45 (-1.70; 0.80) mmHg          |
|                                                  |              |                |                                                                                                                 | ≥ 1 mo<br>Increased low fat dairy without additional interventions (dose NA)   |                                          |                                   |
|                                                  |              |                |                                                                                                                 | ≥ 1 mo<br>Increased whole fat dairy without additional interventions (dose NA) |                                          |                                   |
| FERMENTED DAIRY OR DAIRY PLUS PROBIOTICS         | Usinger 2012 | 15             | 1232 with normal or high normal blood pressure or hypertension                                                  | 4-21 wk<br>Fermented milk                                                      | Intervention vs. placebo                 | -0.67 (-1.48; 0.14) mmHg          |
|                                                  |              |                |                                                                                                                 |                                                                                |                                          |                                   |
|                                                  |              |                |                                                                                                                 |                                                                                |                                          |                                   |
|                                                  |              |                |                                                                                                                 |                                                                                |                                          |                                   |
|                                                  |              |                |                                                                                                                 |                                                                                |                                          |                                   |
|                                                  | Dong 2013    | 5              | No. NA<br>mostly with no antihypertensive drug use                                                              | 8 wk (median)<br>100-450 g/d of probiotic fermented milk                       | Intervention vs. placebo                 | -1.45 (-4.04; 1.14) mmHg          |
|                                                  |              |                |                                                                                                                 |                                                                                |                                          |                                   |
|                                                  |              |                |                                                                                                                 |                                                                                |                                          |                                   |
|                                                  | Dixon 2020   | 3              | 217 with overweight, obesity, pre-type 2 diabetes, type 2 diabetes, MS, hypertension, CHD, hypercholesterolemia | Yogurt added with probiotics (duration and dose NA)                            | Intervention vs. no treatment or placebo | -3.54 (-5.13; -1.96) mmHg         |
|                                                  |              |                |                                                                                                                 |                                                                                |                                          |                                   |
|                                                  | Dixon 2020   | 4              | 214 with overweight, obesity, pre-type 2 diabetes, type 2 diabetes, MS,                                         | Milk added with probiotics (duration and dose NA)                              | Intervention vs. no treatment or placebo | -1.97 (-4.52; 0.58) mmHg          |

hypertension, CHD, hypercholesterolemia

CI: confidence interval; CHD: coronary heart disease; MS: metabolic syndrome; wk: week(s); mo: month(s); g/d: grams per day; NA: not available.

**Table S4.** Summary of meta-analyses of randomized controlled trials on the effect of dairy products intake on plasma lipids.

| Total cholesterol                        |                    |                |                                                                            |                                                                                           |                                          |                                   |
|------------------------------------------|--------------------|----------------|----------------------------------------------------------------------------|-------------------------------------------------------------------------------------------|------------------------------------------|-----------------------------------|
| DAIRY PRODUCT                            | Author, year       | No. of studies | No. and type of subjects                                                   | Intervention (duration and dose)                                                          | Comparison                               | Weighted Mean Difference (95% CI) |
| TOTAL DAIRY                              | Schwingshackl 2018 | NA             | NA                                                                         | Dairy intake (duration and dose NA)                                                       | Intervention vs. fish intake             | -0.01 (-0.51; 0.50) mmol/L        |
|                                          | Schwingshackl 2018 | NA             | NA                                                                         | Dairy intake (duration and dose NA)                                                       | Intervention vs. red meat intake         | 0.02 (-0.46; 0.50) mmol/L         |
|                                          | Schwingshackl 2018 | NA             | NA                                                                         | Dairy intake (duration and dose NA)                                                       | Intervention vs. SSBs intake             | -0.03 (-0.44; 0.39) mmol/L        |
| CHEESE                                   | de Goede 2015      | 5              | 119 Not defined                                                            | 2-6 wk<br>Hard cheese intake (weighted mean difference cheese vs. butter intake: 145 g/d) | Intervention vs. butter                  | -0.28 (-0.36; -0.19) mmol/L       |
| FERMENTED DAIRY OR DAIRY PLUS PROBIOTICS | Sun 2015           | 10             | NA                                                                         | 4-16 wk<br>probiotic milk or yogurt (dose NA)                                             | Intervention vs. placebo                 | -0.31 (-0.42; -0.20) mmol/L       |
|                                          | Cho 2015           | 8              | 378 with normal or high total cholesterol                                  | 4-8 wk of probiotic milk containing live bacteria (dose NA)                               | Intervention vs. placebo                 | -6.8 (-11.7; -1.9) mg/dL          |
|                                          | Cho 2015           | 15             | 637 with high or normal total cholesterol and/or diabetes and/or pregnancy | 3-9 wk of probiotic yogurt/cheese containing live bacteria (dose NA)                      | Intervention vs. placebo                 | -8.3 (-12.4; -4.1) mg/dL          |
|                                          | Shimizu 2015       | NA             | NA                                                                         | Fermented milk products (duration and dose NA)                                            | Intervention vs. placebo or no treatment | -0.22 (-0.33; -0.11) mmol/L       |

|                        |                           |                       |                                                                                                                                                                  |                                                                                      |                                                  |                                          |
|------------------------|---------------------------|-----------------------|------------------------------------------------------------------------------------------------------------------------------------------------------------------|--------------------------------------------------------------------------------------|--------------------------------------------------|------------------------------------------|
|                        | <b>Companys 2020</b>      | 4                     | 248 with hypercholesterolemia                                                                                                                                    | Dairy matrix added with probiotics (duration and dose NA)                            | Intervention vs. placebo or fermented milk       | -0.46 (-0.73; -0.19) mmol/L              |
|                        | <b>Dixon 2020</b>         | 5                     | 393 with overweight, obesity, pre-type 2 diabetes, type 2 diabetes, MS, hypertension, CHD, hypercholesterolemia                                                  | Yogurt added with probiotics (duration and dose NA)                                  | Intervention vs. no treatment or placebo product | -9.48 (-16.17; -2.48) mg/dL              |
|                        | <b>Dixon 2020</b>         | 9                     | 398 with overweight, obesity, pre-type 2 diabetes, type 2 diabetes, MS, hypertension, CHD, hypercholesterolemia                                                  | Milk added with probiotics (duration and dose NA)                                    | Intervention vs. no treatment or placebo product | -8.74 (-14.62; -2.86) mg/dL              |
|                        | <b>Pourrajab 2020</b>     | 7                     | 352 with mild to moderate hypercholesterolemia                                                                                                                   | 4-7 wk of 300 g/d of probiotic yogurt                                                | Intervention vs. ordinary yogurt                 | -8.73 (-15.98; -1.48) mg/dL              |
|                        | <b>Ziaei 2021</b>         | 38                    | 2237 with normal weight, overweight, obesity, MS, NASH, pre-type 2 diabetes, type 2 diabetes, hypercholesterolemia (mostly mild or borderline), pre-hypertension | 2-24 wk<br>80 - 600 ml/d of probiotic fermented milk                                 | Intervention vs. conventional yogurt or milk     | -8.30 (-11.42; -5.18) mg/dL              |
| <b>LDL-cholesterol</b> |                           |                       |                                                                                                                                                                  |                                                                                      |                                                  |                                          |
| <b>DAIRY PRODUCT</b>   | <b>Author, year</b>       | <b>No. of studies</b> | <b>No. and type of subjects</b>                                                                                                                                  | <b>Intervention (duration and dose)</b>                                              | <b>Comparison</b>                                | <b>Weighted Mean Difference (95% CI)</b> |
| <b>TOTAL DAIRY</b>     | <b>Benatar 2013</b>       | 9                     | 702 with normal weight, overweight, obesity, MS                                                                                                                  | 4-26 wk (median 12 wk)<br>Increased dairy without additional interventions (dose NA) | Intervention vs. usual diet                      | 1.85 (-2.89; 6.60) mg/dL                 |
|                        | <b>Schwingshackl 2018</b> | NA                    | NA                                                                                                                                                               | Dairy intake (duration and dose NA)                                                  | Intervention vs. fish intake                     | -0.01 (-0.45; 0.42) mmol/L               |

|                                                 |                           |    |                                                                            |                                                                                           |                                            |                               |
|-------------------------------------------------|---------------------------|----|----------------------------------------------------------------------------|-------------------------------------------------------------------------------------------|--------------------------------------------|-------------------------------|
|                                                 | <b>Schwingshackl 2018</b> | NA | NA                                                                         | Dairy intake (duration and dose NA)                                                       | Intervention vs. red meat intake           | -0.02 (-0.43; 0.39) mmol/L    |
|                                                 | <b>Schwingshackl 2018</b> | NA | NA                                                                         | Dairy intake (duration and dose NA)                                                       | Intervention vs. SSBs intake               | -0.03 (-0.37; 0.31) mmol/L    |
| <b>LOW-FAT DAIRY</b>                            | <b>Benatar 2013</b>       | 3  | 342 with normal weight, overweight, obesity                                | ≥ 1 mo<br>Increased low fat dairy without additional interventions (dose NA)              | Intervention vs. usual diet                | -1.42 (-4.74; 1.91) mg/dL     |
| <b>FULL-FAT DAIRY</b>                           | <b>Benatar 2013</b>       | 6  | 360 with normal weight, overweight, obesity, MS                            | ≥ 1 mo<br>Increased whole fat dairy without additional interventions (dose NA)            | Intervention vs. usual diet                | 3.30 (-4.30; 10.90) mg/dL     |
| <b>CHEESE</b>                                   | <b>de Goede 2015</b>      | 5  | 119<br>Not defined                                                         | 2-6 wk<br>Hard cheese intake (weighted mean difference cheese vs. butter intake: 145 g/d) | Intervention vs. butter                    | -0.22 (-0.29; -0.14) mmol/L   |
|                                                 | <b>Sun 2015</b>           | 11 | NA                                                                         | 4-16 wk of probiotic milk or yogurt (dose NA)                                             | Intervention vs. placebo                   | -0.47 (-0.70; -0.25) mmol/L   |
|                                                 | <b>Cho 2015</b>           | 8  | 378 with normal or high total cholesterol                                  | 4-8 wk of probiotic milk containing live bacteria (dose NA)                               | Intervention vs. placebo                   | -9.2 (-13.4; -4.9) mg/dL      |
| <b>FERMENTED DAIRY OR DAIRY PLUS PROBIOTICS</b> | <b>Cho 2015</b>           | 15 | 637 with high or normal total cholesterol and/or diabetes and/or pregnancy | 3-9 wk of probiotic yogurt/cheese containing live bacteria (dose NA)                      | Intervention vs. placebo                   | -7.6 (-11.5; -3.6) mg/dL      |
|                                                 | <b>Shimizu 2015</b>       | 10 | 397 with normal to moderate hypercholesterolemia                           | Fermented milk products (duration and dose NA)                                            | Intervention vs. placebo or no treatment   | -0.23 (-0.34; -0.13) mmol/L   |
|                                                 | <b>Companys 2020</b>      | 4  | 248 with hypercholesterolemia                                              | Dairy matrix added with probiotics (duration and dose NA)                                 | Intervention vs. placebo or fermented milk | -0.50 (-0.77; -0.22) mmol/L   |
|                                                 | <b>Dixon 2020</b>         | 4  | 370 with overweight, obesity, pre-type 2 diabetes, type                    | Yogurt added with probiotics (duration and dose NA)                                       | Intervention vs. no treatment or placebo   | -18.06 (-24.88; -11.24) mg/dL |



|                 |              |                | 2 diabetes, MS, hypertension, CHD, hypercholesterolemia                                                                                                          |                                                                    |                                              |                                    |
|-----------------|--------------|----------------|------------------------------------------------------------------------------------------------------------------------------------------------------------------|--------------------------------------------------------------------|----------------------------------------------|------------------------------------|
|                 |              |                | 287 with overweight, obesity, pre-type 2 diabetes, type 2 diabetes, MS, hypertension, CHD, hypercholesterolemia                                                  | Milk added with probiotics (duration and dose NA)                  | Intervention vs. no treatment or placebo     | -9.82 (-18.28; -1.36) mg/dL        |
|                 |              |                | 352 with mild to moderate hypercholesterolemia                                                                                                                   | 4-7 wk of 300 g/d of probiotic yogurt                              | Intervention vs. ordinary yogurt             | -10.61 (-16.52; -4.69) mg/dL       |
|                 |              |                | 1065 with normal weight, overweight, obesity, MS, NASH, pre-type 2 diabetes, type 2 diabetes, hypercholesterolemia (mostly mild or borderline), pre-hypertension | 2-24 wk<br>80 to 600 ml/d of probiotic fermented milk              | Intervention vs. conventional yogurt or milk | -7.34 (-10.04; -4.65) mg/dL        |
| HDL-cholesterol |              |                |                                                                                                                                                                  |                                                                    |                                              |                                    |
| DAIRY PRODUCT   | Author, year | No. of studies | No. and type of subjects                                                                                                                                         | Intervention (duration and dose)                                   | Comparison                                   | Weighted Mean Difference (95 % CI) |
|                 |              |                |                                                                                                                                                                  | 4-26 wk (median 12 wk)                                             |                                              |                                    |
| TOTAL DAIRY     | Benatar 2013 | 8              | 664 with normal weight, overweight, obesity, MS                                                                                                                  | Increased dairy without additional interventions (dose NA)         | Intervention vs. usual diet                  | -0.19 (-2.10; 1.71) mg/dL          |
|                 |              |                |                                                                                                                                                                  | ≥ 1 mo                                                             |                                              |                                    |
| LOW-FAT DAIRY   | Benatar 2013 | 3              | 342 with normal weight, overweight, obesity                                                                                                                      | Increased low fat dairy without additional interventions (dose NA) | Intervention vs. usual diet                  | 0.73 (-2.50; 3.96) mg/dL           |

|                                          |                |    |                                                                                                                 |                                                                                           |                                            |                             |
|------------------------------------------|----------------|----|-----------------------------------------------------------------------------------------------------------------|-------------------------------------------------------------------------------------------|--------------------------------------------|-----------------------------|
| FULL-FAT DAIRY                           | Benatar 2013   | 6  | 360 with normal weight, overweight, obesity, MS                                                                 | ≥ 1 mo<br>Increased whole fat dairy without additional interventions (dose NA)            | Intervention vs. usual diet                | -0.69 (-3.04; 1.67) mg/dL   |
|                                          | de Goede 2015  | 5  | 119<br>Not defined                                                                                              | 2-6 wk<br>Hard cheese intake (weighted mean difference cheese vs. butter intake: 145 g/d) | Intervention vs. butter                    | -0.05 (-0.09; -0.02) mmol/L |
| FERMENTED DAIRY OR DAIRY PLUS PROBIOTICS | Sun 2015       | 7  | NA                                                                                                              | 4-16 wk of probiotic milk or yogurt (dose NA)                                             | Intervention vs. placebo                   | 0.02 (-0.01;0.05) mmol/L    |
|                                          | Cho 2015       | 8  | 378 with normal or high total cholesterol                                                                       | 4-8 wk of probiotic milk containing live bacteria (dose NA)                               | Intervention vs. placebo                   | -2.1 (-4.5; 0.3) mg/ dL     |
|                                          | Cho 2015       | 15 | 637 with high or normal total cholesterol and/or diabetes and/or pregnancy                                      | 3-9 wk of probiotic yogurt/cheese containing live bacteria (dose NA)                      | Intervention vs. placebo                   | 0.8 (-0.6; 2.1) mg/ dL      |
|                                          | Company's 2020 | 4  | 248 with hypercholesterolemia                                                                                   | Dairy matrix added with probiotics (duration and dose NA)                                 | Intervention vs. placebo or fermented milk | 0.26 (0.01; 0.52) mmol/L    |
|                                          | Dixon 2020     | 4  | 370 with overweight, obesity, pre-type 2 diabetes, type 2 diabetes, MS, hypertension, CHD, hypercholesterolemia | Yogurt added with probiotics (duration and dose NA)                                       | Intervention vs. no treatment or placebo   | 0.25 (-1.82; 2.32) mg/ dL   |
|                                          | Dixon 2020     | 8  | 363 with overweight, obesity, pre-type 2 diabetes, type 2 diabetes, MS, hypertension, CHD, hypercholesterolemia | Milk added with probiotics (duration and dose NA)                                         | Intervention vs. no treatment or placebo   | 0.86 (-2.07; 3.80) mg/ dL   |

|                                                 |                           |                       |                                                                                                                                                                  |                                                                                           |                                              |                                          |
|-------------------------------------------------|---------------------------|-----------------------|------------------------------------------------------------------------------------------------------------------------------------------------------------------|-------------------------------------------------------------------------------------------|----------------------------------------------|------------------------------------------|
|                                                 | <b>Pourrajab 2020</b>     | 7                     | 352 with mild to moderate hypercholesterolemia                                                                                                                   | 4-7 wk of 300 g/d of probiotic yogurt                                                     | Intervention vs. ordinary yogurt             | 1.56 (−1.58; 4.71) mg/ dL                |
|                                                 | <b>Ziaei 2021</b>         | 38                    | 2267 with normal weight, overweight, obesity, MS, NASH, pre-type 2 diabetes, type 2 diabetes, hypercholesterolemia (mostly mild or borderline), pre-hypertension | 2-24 wk<br>80-600 ml/d of probiotic fermented milk                                        | Intervention vs. conventional yogurt or milk | 0.07 (−0.73; 0.87) mg/ dL                |
| <b>Triglycerides</b>                            |                           |                       |                                                                                                                                                                  |                                                                                           |                                              |                                          |
| <b>DAIRY PRODUCT</b>                            | <b>Author, year</b>       | <b>No. of studies</b> | <b>No. and type of subjects</b>                                                                                                                                  | <b>Intervention (duration and dose)</b>                                                   | <b>Comparison</b>                            | <b>Weighted Mean Difference (95% CI)</b> |
| <b>TOTAL DAIRY</b>                              | <b>Schwingshackl 2018</b> | NA                    | NA                                                                                                                                                               | Dairy intake (duration and dose NA)                                                       | Intervention vs. fish intake                 | 0.17 (−0.10; 0.45) mmol/L                |
|                                                 | <b>Schwingshackl 2018</b> | NA                    | NA                                                                                                                                                               | Dairy intake (duration and dose NA)                                                       | Intervention vs. red meat intake             | 0.09 (−0.18; 0.36) mmol/L                |
|                                                 | <b>Schwingshackl 2018</b> | NA                    | NA                                                                                                                                                               | Dairy intake (duration and dose NA)                                                       | Intervention vs. SSBs intake                 | −0.13 (−0.42; 0.16) mmol/L               |
| <b>CHEESE</b>                                   | <b>de Goede 2015</b>      | 5                     | 119<br>Not defined                                                                                                                                               | 2-6 wk<br>Hard cheese intake (weighted mean difference cheese vs. butter intake: 145 g/d) | Intervention vs. butter                      | −0.008 (−0.064; 0.049) mmol/L            |
| <b>FERMENTED DAIRY OR DAIRY PLUS PROBIOTICS</b> | <b>Sun 2015</b>           | 9                     | NA                                                                                                                                                               | 4-16 wk of probiotic milk or yogurt (dose NA)                                             | Intervention vs. placebo                     | −0.02 (−0.18; 0.33) mmol/L               |
|                                                 | <b>Cho 2015</b>           | 8                     | 378 with normal or high total cholesterol                                                                                                                        | 4-8 wk of probiotic milk containing live bacteria (dose NA)                               | Intervention vs. placebo                     | 3.8 (−2.0; 0.95) mg/ dL                  |

|                       |    |                                                                                                                 |                                                                      |                                            |                              |
|-----------------------|----|-----------------------------------------------------------------------------------------------------------------|----------------------------------------------------------------------|--------------------------------------------|------------------------------|
| <b>Cho 2015</b>       | 15 | 637 with high or normal total cholesterol and/or diabetes and/or pregnancy                                      | 3-9 wk of probiotic yogurt/cheese containing live bacteria (dose NA) | Intervention vs. placebo                   | -8.1 (-16.9; 0.74) mg/ dL    |
| <b>Company's 2020</b> | 3  | 172 with hypercholesterolemia                                                                                   | Dairy matrix added with probiotics (duration and dose NA)            | Intervention vs. placebo or fermented milk | -0.46 (-0.75; -0.14) mmol/L  |
| <b>Dixon 2020</b>     | 5  | 393 with overweight, obesity, pre-type 2 diabetes, type 2 diabetes, MS, hypertension, CHD, hypercholesterolemia | Yogurt added with probiotics (duration and dose NA)                  | Intervention vs. no treatment or placebo   | -1.61 (-6.50; 9.71) mg/ dL   |
| <b>Dixon 2020</b>     | 10 | 438 with overweight, obesity, pre-type 2 diabetes, type 2 diabetes, MS, hypertension, CHD, hypercholesterolemia | Milk added with probiotics (duration and dose NA)                    | Intervention vs. no treatment or placebo   | -6.99 (-26.34; 12.36) mg/ dL |

CI: confidence interval; NASH: nonalcoholic steatohepatitis; CHD: coronary heart disease; MS: metabolic syndrome; wk: week(s); mo: month(s); g: grams; d: day; NA: not available.

**Table S5.** Summary of meta-analyses of randomized controlled trials on the effect of dairy products intake on markers of subclinical inflammation.

| DAIRY PRODUCT      | Author, year   | No. of studies | No. and type of subjects                        | C-reactive protein                                                                   |                                         | Weighted Mean Difference (95% CI) |
|--------------------|----------------|----------------|-------------------------------------------------|--------------------------------------------------------------------------------------|-----------------------------------------|-----------------------------------|
|                    |                |                |                                                 | Intervention (duration and dose)                                                     | Comparison                              |                                   |
| TOTAL DAIRY        | Benatar 2013   | 6              | 451 with normal weight, overweight, obesity, MS | 7-26 wk (median 19 wk)<br>Increased dairy without additional interventions (dose NA) | Intervention vs. usual diet             | -1.07 (-2.54; 0.39) mg/L          |
|                    | Moosavian 2020 | 10             | 641 with normal weight, overweight, obesity, MS | Elevated dairy intake (duration and dose NA)                                         | Intervention vs. low or no dairy intake | -0.24 (-0.35; -0.14) mg/L         |
| LOW-FAT DAIRY      | Benatar 2013   | 3              | 182 with overweight, obesity                    | ≥ 1 mo<br>Increased low dairy without additional interventions (dose NA)             | Intervention vs. usual diet             | -0.62 (-1.35; 0.11) mg/L          |
| FULL-FAT DAIRY     | Benatar 2013   | 3              | 269 with normal weight, overweight, obesity, MS | ≥ 1 mo<br>Increased whole fat dairy without additional interventions (dose NA)       | Intervention vs. usual diet             | -1.81 (-5.47; 1.84) mg/L          |
| MILK AND/OR YOGURT | Moosavian 2020 | 5              | NA                                              | Elevated milk/yogurt intake (duration and dose NA)                                   | Intervention vs. placebo                | -0.95 (-1.65; 0.24) mg/L          |
| TNF- $\alpha$      |                |                |                                                 |                                                                                      |                                         |                                   |
| TOTAL DAIRY        | Moosavian 2020 | 8              | NA                                              | Elevated dairy intake (duration and dose NA)                                         | Intervention vs. low or no dairy intake | -0.66 (-1.23; -0.09) pg/mL        |
| MILK AND/OR YOGURT | Moosavian 2020 | 3              | NA                                              | Elevated milk/yogurt intake (duration and dose NA)                                   | Intervention vs. placebo                | -0.37 (-0.56; -0.18) pg/mL        |
| IL-6               |                |                |                                                 |                                                                                      |                                         |                                   |
| TOTAL DAIRY        | Moosavian 2020 | 7              | NA                                              | Elevated dairy intake (duration and dose NA)                                         | Intervention vs. low or no dairy intake | -0.74 (-1.36; -0.12) pg/mL        |

|                          |                   |   |    |                                                            |                                                 |                           |
|--------------------------|-------------------|---|----|------------------------------------------------------------|-------------------------------------------------|---------------------------|
| MILK<br>AND/OR<br>YOGURT | Moosavian<br>2020 | 3 | NA | Elevated milk/yogurt in-<br>take (duration and dose<br>NA) | Intervention vs.<br>placebo                     | -0.43 (-2.69; 1.83) pg/mL |
| <b>Adiponectin</b>       |                   |   |    |                                                            |                                                 |                           |
| TOTAL<br>DAIRY           | Moosavian<br>2020 | 7 | NA | Elevated dairy intake<br>(duration and dose NA)            | Intervention vs.<br>low or no dairy in-<br>take | 2.42 (0.17; 4.66) µg/mL   |
| MILK<br>AND/OR<br>YOGURT | Moosavian<br>2020 | 3 | NA | Elevated milk/yogurt in-<br>take (duration and dose<br>NA) | Intervention vs.<br>placebo                     | 14.28 (5.81; 22.74) µg/mL |

CI: confidence interval; MS: metabolic syndrome; TNF- $\alpha$ : tumor necrosis factor- $\alpha$ ; IL-6: interleuchin-6; wk: week(s); mo: month(s); NA: not available.
